# Supplementary material for: Evaluation of a cooling/heating-assisted microextraction instrument using a needle trap device packed with aminosilica/graphene oxide nanocomposites, covalently attached to cotton
Source: Royal Society of Chemistry journal article supplement (doi:10.1039/c8an00063h), 2018-01-01
Supplement: c8an00063h1.pdf [file c8an00063h1.pdf]

## Electronic Supplementary Information (ESI)

### Evaluation of the cooling/heating-assisted microextraction instrument using a needle trap device packed with aminosilica/graphene oxide nanocomposite, covalently attached to cotton

A.R. Ghiasvand<sup>a,†</sup>, N. Heidari<sup>a</sup>, S. Abdolhosseini<sup>a</sup>, A. Hamdi<sup>a</sup>, P.R. Haddad<sup>b</sup>

<sup>a</sup>*Department of Chemistry, Lorestan University, Khoramabad, Iran*

<sup>a</sup>*Australian Centre for Research on Separation Science, School of Physical Sciences, University of Tasmania, Hobart, Tasmania 7001, Australia*

**Running title:** Cooling/Heating-Assisted Microextraction Instrument (CHaME)

**Keywords:** Cooling/heating-assisted microextraction; Needle trap device; Aminosilica/graphene oxide/cotton composite; Contaminated soil; PAHs; GC-FID

**Corresponding Author:** Alireza Ghiasvand

**Address:** Department of Chemistry, Lorestan University, Khoramabad, Iran

**E-mail:** [a\\_ghiasvand@yahoo.com](mailto:a_ghiasvand@yahoo.com)

**Tel-Fax:** + 98 6633120610-12

**ORCID ID:** [0000-0002-4570-7988](https://orcid.org/0000-0002-4570-7988)

#### Table of Contents:

**Fig. S-1** NTD temperature vs. the extracted amount of the PAHs using the CHaME-NTD-GC-FID procedure (desorption condition: 280 °C, 4 min; sample temperature: 130 °C; sampling flow rate: 28 mL min<sup>-1</sup>; sampling time: 20 min).

**Fig. S-2** The study of the extraction efficiency to variation of sampling flow rate on the extraction efficiency of the CHaME-NTD-GC-FID strategy, at constant sampling time (desorption condition: 280 °C, 4 min; sample temperature: 130 °C; NTD temperature: 5 °C; extraction time: 20 min).

**Fig. S-3** Effect of extraction time on the extraction efficiency of the CHaME-NTD-GC-FID method (desorption condition: 280 °C, 4 min; extraction temperature: 130 °C; NTD temperature: 5 °C; sampling flow rate: 21 mL min<sup>-1</sup>).

**Table S-1** Analytical figures of merit for analysis of the PAHs in solid samples using CAaME-NTD-GC-FID method.

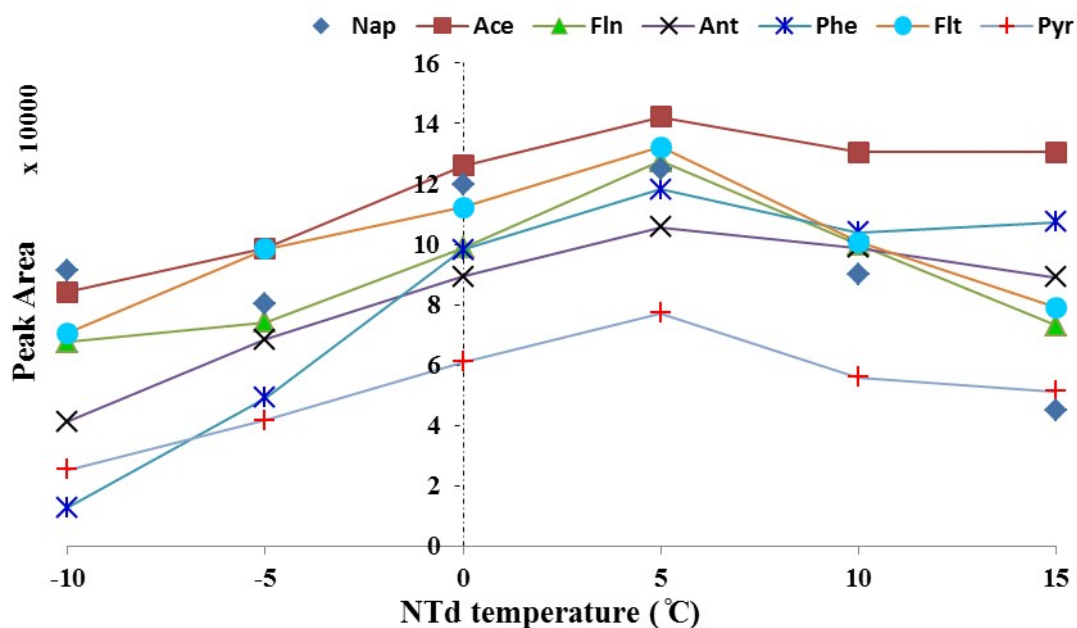

**Fig. S-1** NTD temperature vs. the extracted amount of the PAHs using the CHaME-NTD-GC-FID procedure (desorption condition: 280 °C, 4 min; sample temperature: 130 °C; sampling flow rate: 28 mL min<sup>-1</sup>; sampling time: 20 min).

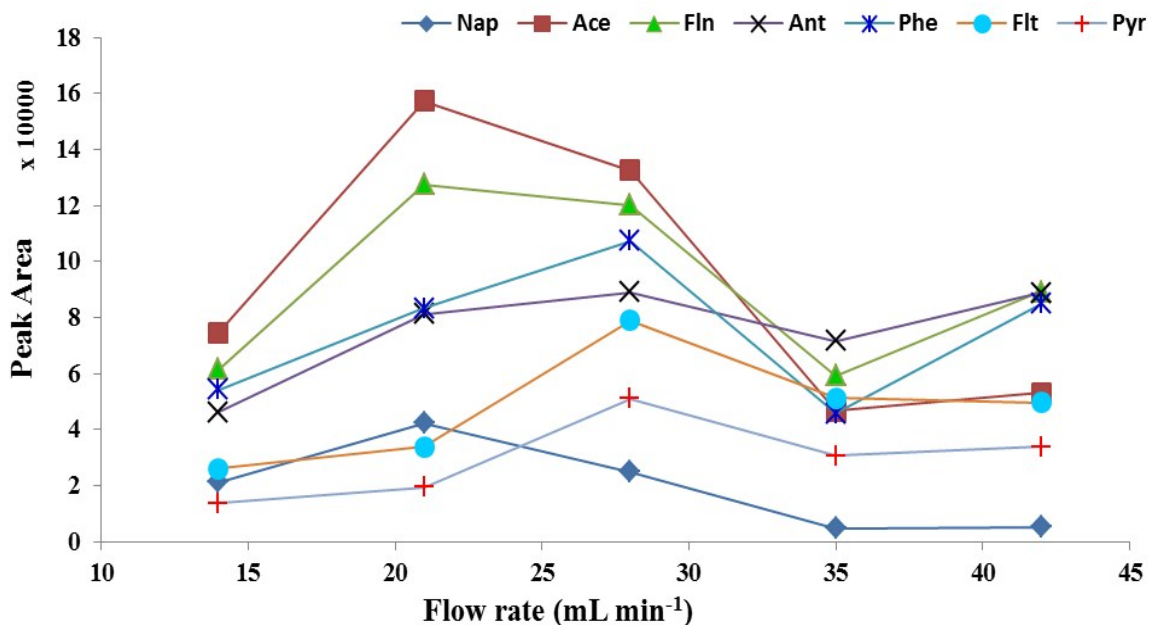

**Fig. S-2** The study of the extraction efficiency to variation of sampling flow rate on the extraction efficiency of the CHaME-NTD-GC-FID strategy, at constant sampling time (desorption condition: 280 °C, 4 min; sample temperature: 130 °C; NTD temperature: 5 °C; extraction time: 20 min).

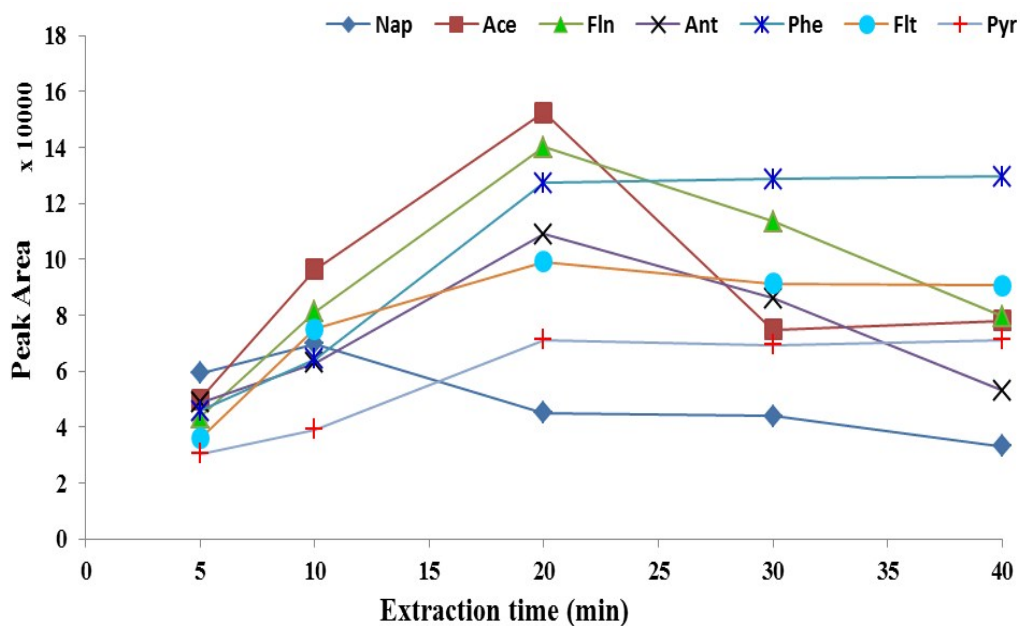

**Fig. S-3** Effect of extraction time on the extraction efficiency of the CHaME-NTD-GC-FID method (desorption condition: 280 °C, 4 min; extraction temperature: 130 °C; NTD temperature: 5 °C; sampling flow rate: 21 mL min<sup>-1</sup>).

**Table S-1** Analytical figures of merit for analysis of the PAHs in solid samples using CAaME-NTD-GC-FID method.

| Analyte    | LOD (ng g <sup>-1</sup> ) | Equation <sup>a</sup> | R <sup>2</sup> | RSD (%<br>n=6) | T-test value (f=4) | r     |
|------------|---------------------------|-----------------------|----------------|----------------|--------------------|-------|
| <b>Nap</b> | 0.012                     | Y=288556.2x+1035.1    | 0.994          | 6.2            | 2.59               | 0.942 |
| <b>Ace</b> | 0.005                     | Y=1002056.3x+35195.0  | 0.997          | 7.2            | 2.82               | 0.998 |
| <b>Fln</b> | 0.017                     | Y=887590.6x+11754.6   | 0.996          | 9.8            | 2.82               | 0.998 |
| <b>Ant</b> | 0.013                     | Y=831773.5x+16495.3   | 0.996          | 8.9            | 2.79               | 0.993 |
| <b>Phe</b> | 0.038                     | Y=373130.9x+50919.5   | 0.992          | 8.1            | 2.81               | 0.995 |
| <b>Flt</b> | 0.036                     | Y=432474.3x+11958.9   | 0.995          | 7.4            | 2.81               | 0.997 |
| <b>Pyr</b> | 0.033                     | Y=255222.2x+27666.7   | 0.993          | 7.9            | 2.81               | 0.996 |

<sup>a</sup>Y: Peak area, x: Concentration (µg per g of solid sample)
